# Supplementary material for: The recovery of North Atlantic right whales, Eubalaena glacialis, has been constrained by human-caused mortality
Source: R Soc Open Sci. 2018 Nov 7;5(11):180892. doi: 10.1098/rsos.180892 (PMC6281934; doi:10.1098/rsos.180892)
Supplement: Supplement 2: R code for GLMs [file rsos180892supp2.r]

#Comparative calving data for NARW & SRW
################################
#Empty environment before starting
rm(list=ls())
###################################
#load libraries
require('ggplot2')
require('ggfortify')
require('MASS')
require('sjPlot')
require('phia')
#################################
#First, compare plots of full populations
#read data
calves<-read.csv("CalvingFinal.csv", header=TRUE)
str(calves)
#make a data frame with the NAs excluded
calves.nona<-na.omit(calves)
str(calves.nona)
###############################
#plot
p = ggplot(calves.nona, aes(Year,Calves,colour=Site))+geom_point()+geom_line()
p
######################
#set colors
#This is Figure 1
p2<-p+scale_color_brewer(palette="Set1")
p2
###############################
#do a GLM
sitex.glm<-glm.nb(Calves~Site*Year, data=calves.nona)
sitex.glm
summary(sitex.glm)
#########################3
#look at the model
#This is Figure 3
p3<-plot_model(sitex.glm, type='eff', terms=c('Year','Site'), 
               title='')
p3
#######################
#This is Table 1
#testInteractions(sitex.glm)
testInteractions(sitex.glm, pairwise='Site',slope='Year',
                 adjustment='BH')
#Extract back-transformed means & SEs
#To creates Table 2
int.mn<-interactionMeans(sitex.glm, atx='Site', slope='Year')
round(int.mn$Year,4)
round(int.mn[,3],5)
############################
