# Supplementary material for: The recovery of North Atlantic right whales, Eubalaena glacialis, has been constrained by human-caused mortality
Source: R Soc Open Sci. 2018 Nov 7;5(11):180892. doi: 10.1098/rsos.180892 (PMC6281934; doi:10.1098/rsos.180892)
Supplement: Supplement 4: calf count data over time (csv file) [file rsos180892supp4.csv]

Year	Calves	Site
1992	12	NARW
1993	8	NARW
1994	9	NARW
1995	7	NARW
1996	22	NARW
1997	20	NARW
1998	6	NARW
1999	4	NARW
2000	1	NARW
2001	31	NARW
2002	21	NARW
2003	19	NARW
2004	17	NARW
2005	28	NARW
2006	19	NARW
2007	23	NARW
2008	23	NARW
2009	39	NARW
2010	19	NARW
2011	22	NARW
2012	7	NARW
2013	20	NARW
2014	11	NARW
2015	17	NARW
2016	5	NARW
1992	NA	SRWOz
1993	60	SRWOz
1994	48	SRWOz
1995	64	SRWOz
1996	55	SRWOz
1997	53	SRWOz
1998	111	SRWOz
1999	84	SRWOz
2000	73	SRWOz
2001	142	SRWOz
2002	107	SRWOz
2003	94	SRWOz
2004	107	SRWOz
2005	177	SRWOz
2006	150	SRWOz
2007	57	SRWOz
2008	236	SRWOz
2009	244	SRWOz
2010	134	SRWOz
2011	236	SRWOz
2012	220	SRWOz
2013	246	SRWOz
2014	232	SRWOz
2015	97	SRWOz
2016	228	SRWOz
1992	84	SRWSAf
1993	90	SRWSAf
1994	90	SRWSAf
1995	96	SRWSAf
1996	134	SRWSAf
1997	119	SRWSAf
1998	111	SRWSAf
1999	153	SRWSAf
2000	152	SRWSAf
2001	169	SRWSAf
2002	193	SRWSAf
2003	180	SRWSAf
2004	186	SRWSAf
2005	209	SRWSAf
2006	230	SRWSAf
2007	185	SRWSAf
2008	237	SRWSAf
2009	252	SRWSAf
2010	212	SRWSAf
2011	247	SRWSAf
2012	224	SRWSAf
2013	258	SRWSAf
2014	NA	SRWSAf
2015	NA	SRWSAf
2016	NA	SRWSAf
1992	61	SRWSAm
1993	102	SRWSAm
1994	112	SRWSAm
1995	88	SRWSAm
1996	119	SRWSAm
1997	97	SRWSAm
1998	86	SRWSAm
1999	158	SRWSAm
2000	140	SRWSAm
2001	112	SRWSAm
2002	186	SRWSAm
2003	209	SRWSAm
2004	137	SRWSAm
2005	239	SRWSAm
2006	227	SRWSAm
2007	372	SRWSAm
2008	336	SRWSAm
2009	346	SRWSAm
2010	290	SRWSAm
2011	271	SRWSAm
2012	388	SRWSAm
2013	416	SRWSAm
2014	275	SRWSAm
2015	261	SRWSAm
2016	NA	SRWSAm
